# Supplementary material
Source: PubMed Central journal article supplement (PMC4704092)
Supplement: NIHMS673359-supplement-1.pdf [file NIHMS673359-supplement-1.pdf]

**a** c4: DKT linker

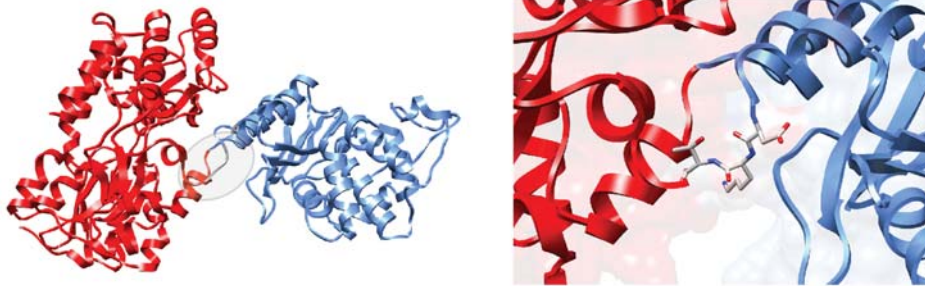

**b** c4-3G: GGG linker

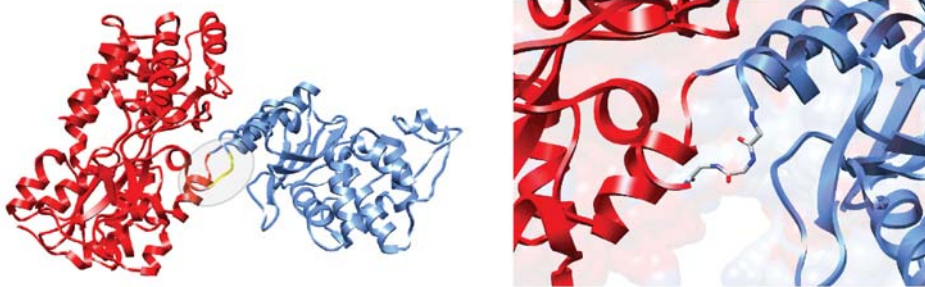

**c** c4-3hx: 3-coiled-helix linker

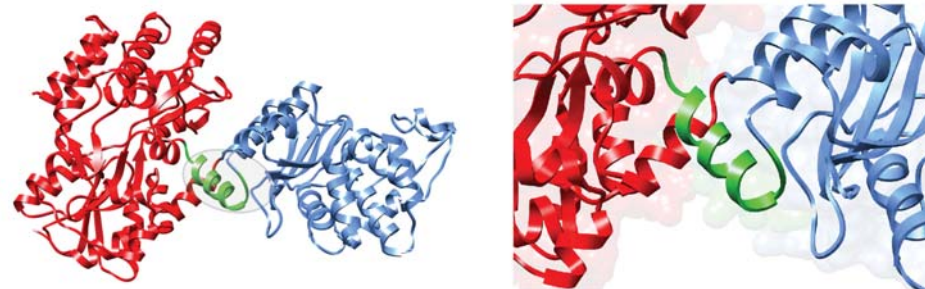

**d** c4-3hx: random coil linker

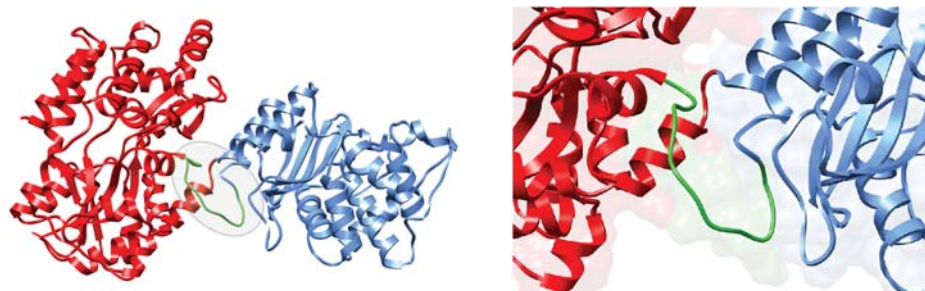

**Supplementary Figure 1.** Structure models of the c4 variant proteins based on the structures of maltose binding protein (MBP) in red and TEM-1 β-lactamase (BLA) in blue. **(a)** c4 model and the close-up view of DKT linker with the side-chains. **(b)** c4-3G with GGG linker (yellow) and the close-up view. **(c)** c4-3hx in acidic condition. The linker, (EAQA)<sub>3</sub>, is in α-helical conformation and is shown in green. **(d)** c4-3hx in basic condition. The linker, (EAQA)<sub>3</sub>, is in a random coil form and is shown in green.

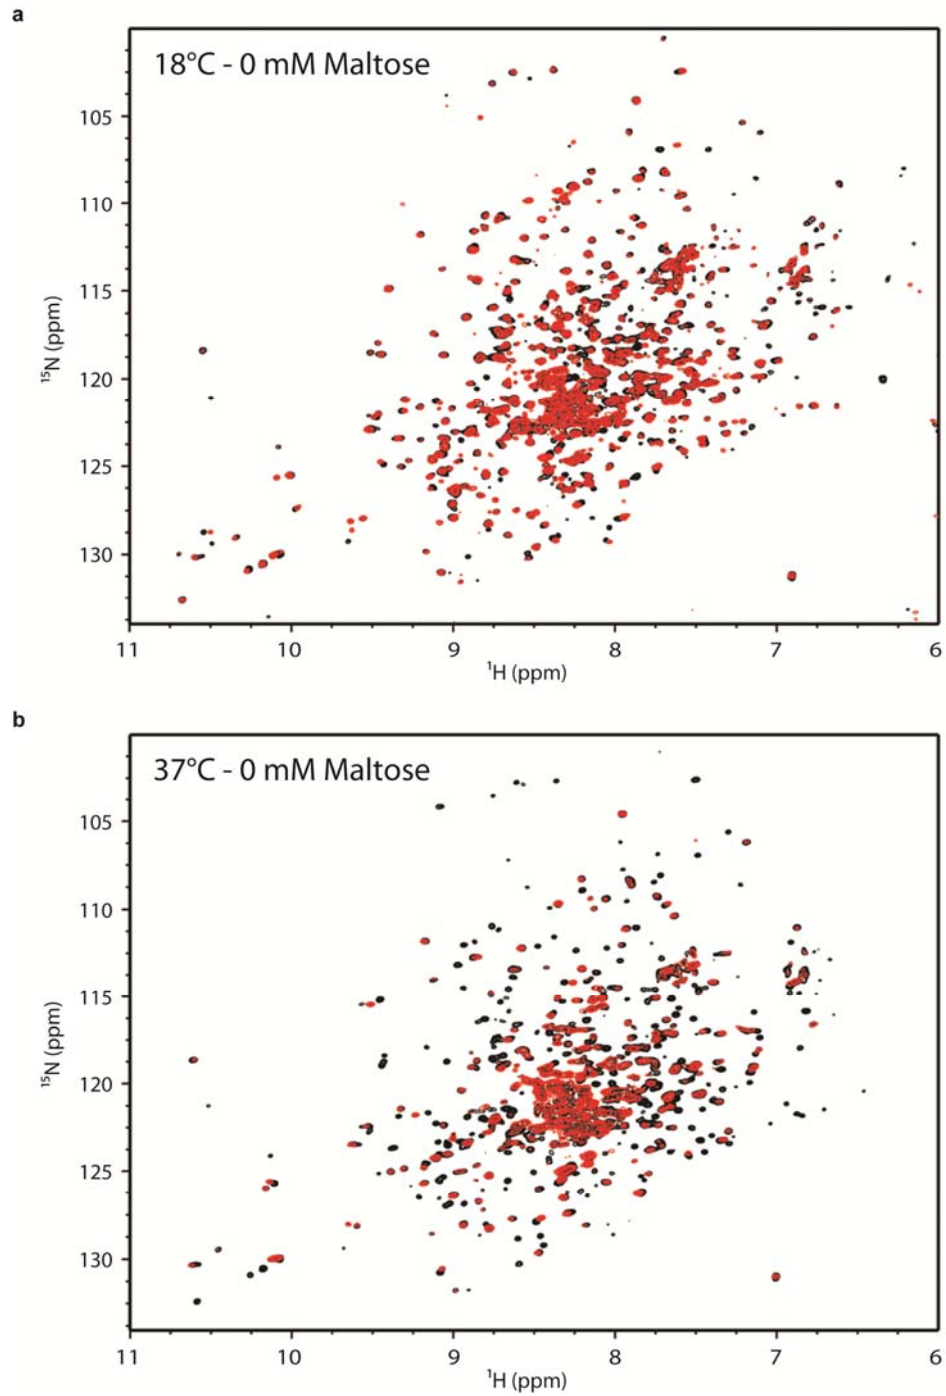

**Supplementary Figure 2.** The overlays of  $^{15}\text{N}$ -TROSY-HSQC spectra of c4 and c4-3G at 18°C and 37°C in the absence of maltose. The black spectrum was acquired from c4, and the red spectrum was acquired from c4-3G at (a) 18°C and (b) 37°C.

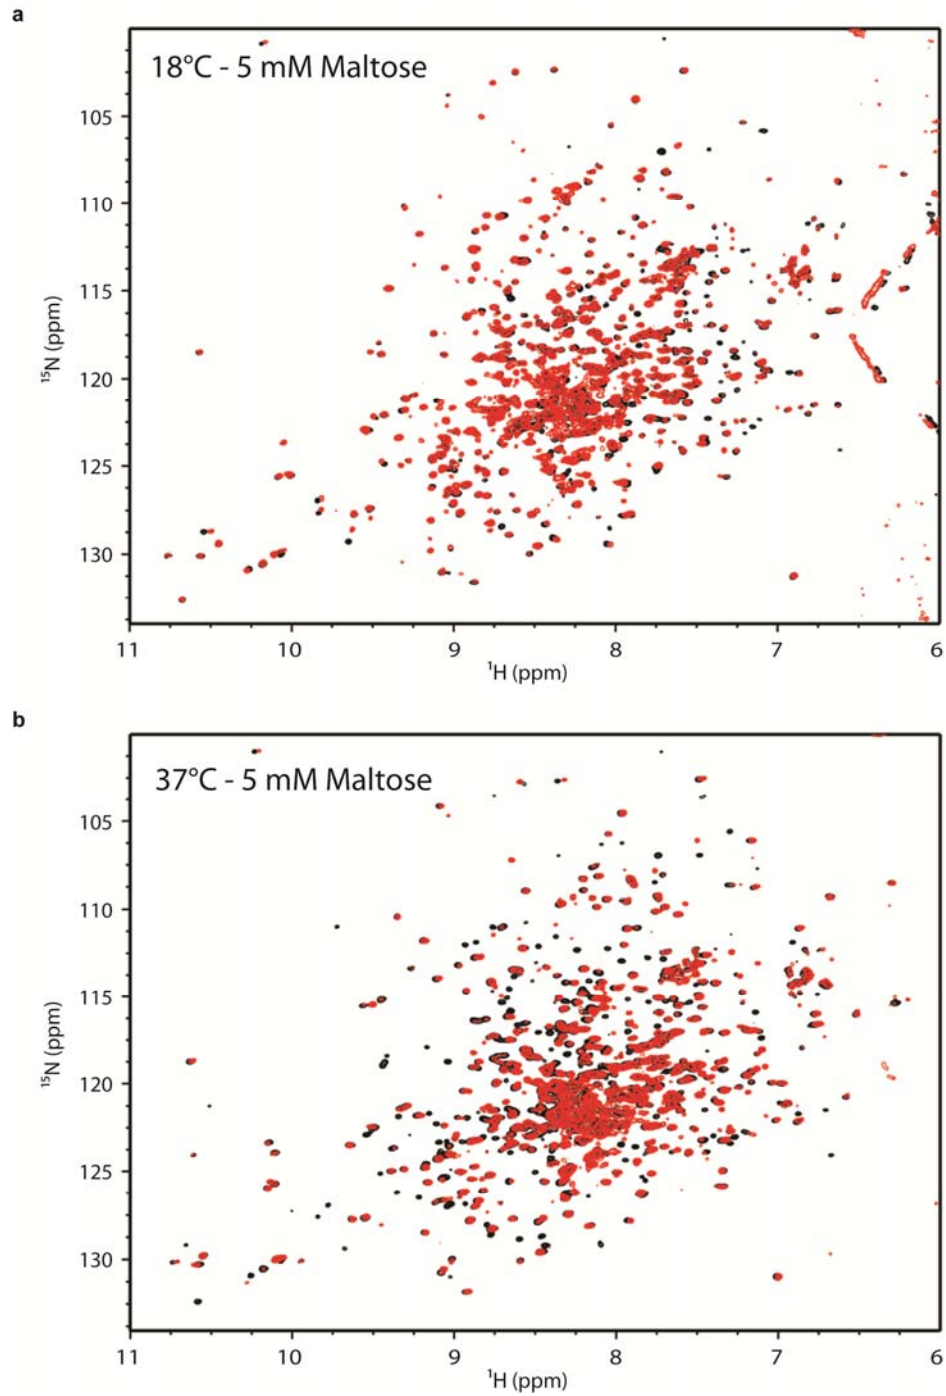

**Supplementary Figure 3.** The overlays of  $^{15}\text{N}$ -TROSY-HSQC spectra of c4 and c4-3G at 18°C and 37°C in the presence of maltose. The black spectrum was acquired from c4, and the red spectrum was acquired from c4-3G at (a) 18°C and (b) 37°C.

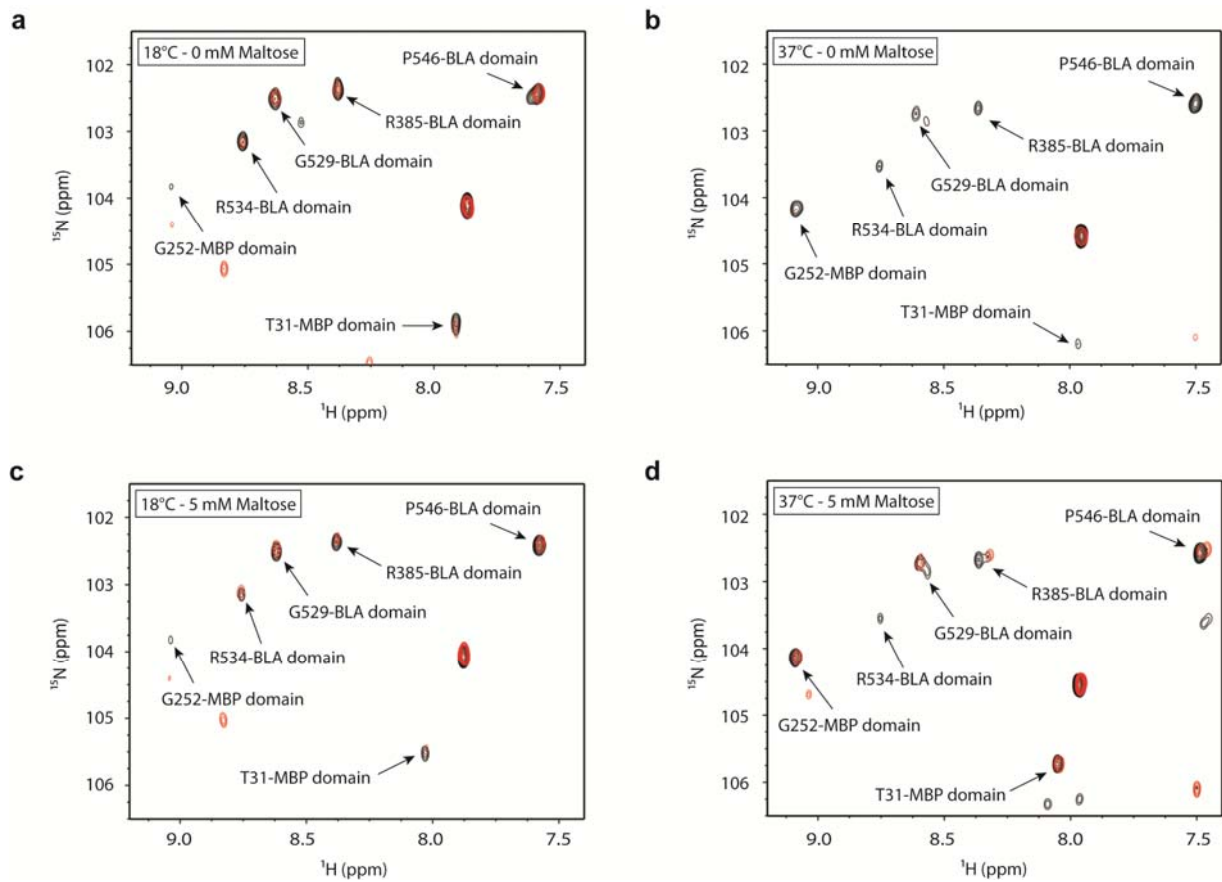

**Supplementary Figure 4.** A close-up view of a region in the c4 and c4-3G spectra overlay at **(a)** 18°C in the absence of maltose, **(b)** 37°C in the absence of maltose, **(c)** 18°C in the presence of 5 mM maltose, and **(d)** 37°C in the presence of 5 mM maltose. The black spectrum was acquired from c4, and the red spectrum was acquired from c4-3G.

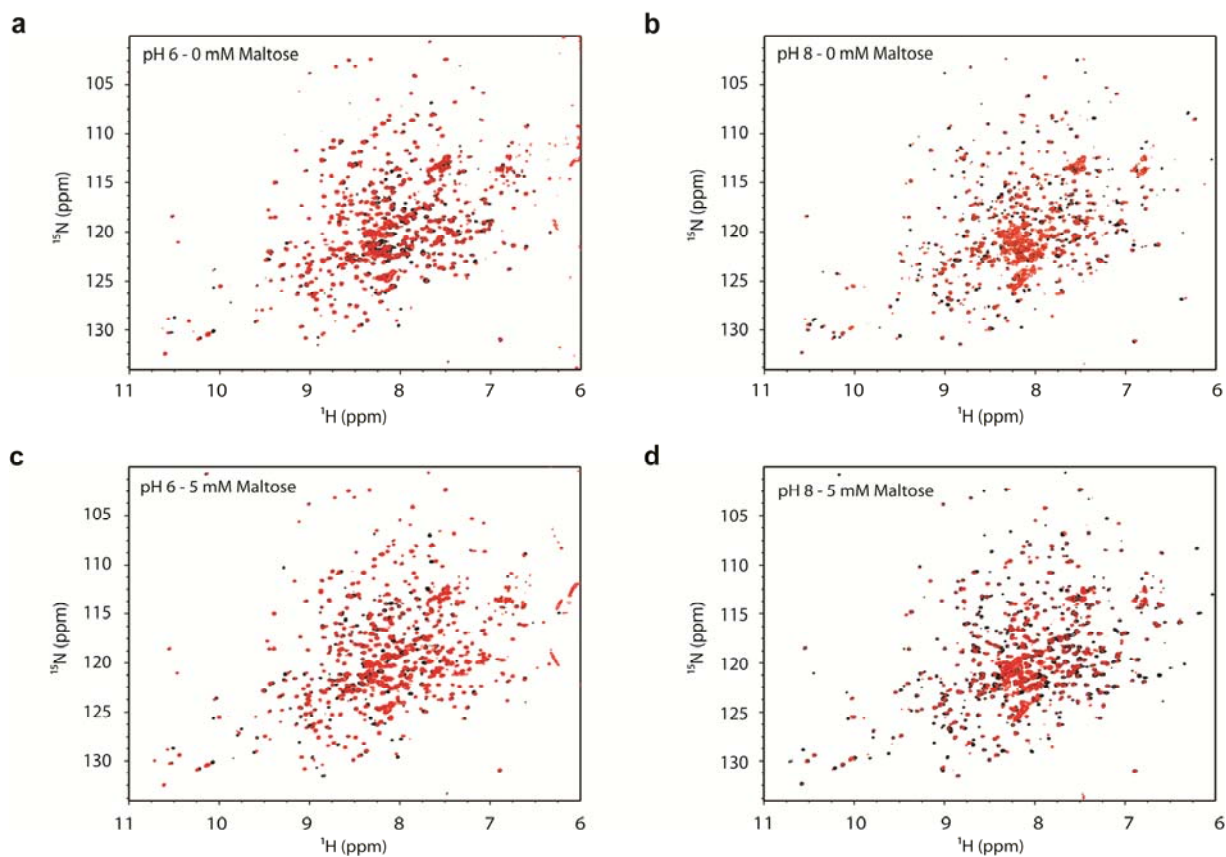

**Supplementary Figure 5.** The overlays of  $^{15}\text{N}$ -TROSY-HSQC spectra of c4 and c4-3hx in pH 6 and pH 8 in the absence and presence of maltose at 25°C. The black spectrum was acquired from c4, and the red spectrum was acquired from c4-3hx at (a) pH 6 in the absence of maltose, (b) at pH 8 in the absence of maltose, (c) at pH 6 in the presence of 5 mM maltose, and (d) pH 8 in the presence of maltose.

## SUPPLEMENTARY TABLES

Supplementary Table 1. Primary sequence of fusion proteins used in this study.

| Protein (linker <sup>a</sup> ) | Protein Sequence <sup>b</sup>                                       |
|--------------------------------|---------------------------------------------------------------------|
| c4 (DKT)                       | MBP[1-316]-BLA[24-286]-DKT-MBP[319-370]-6xHis                       |
| c4-1G (GKT)                    | MBP[1-316]-BLA[24-286]-GKT-MBP[319-370]-6xHis                       |
| c4-2G (GGT)                    | MBP[1-316]-BLA[24-286]-GGT-MBP[319-370]-6xHis                       |
| c4-3G (GGG)                    | MBP[1-316]-BLA[24-286]-GGG-MBP[319-370]-6xHis                       |
| c4-4G (G/GGG)                  | MBP[1-315]-G-BLA[24-286]-GGG-MBP[319-370]-6xHis                     |
| c4-5G (GG/GGG)                 | MBP[1-314]-GG-BLA[24-286]-GGG-MBP[319-370]-6xHis                    |
| c4-2hx (EAQA) <sub>2</sub>     | MBP[1-316]-BLA[24-286]-G-(EAQA) <sub>2</sub> -EG-MBP[319-370]-6xHis |
| c4-3hx (EAQA) <sub>3</sub>     | MBP[1-316]-BLA[24-286]-G-(EAQA) <sub>3</sub> -EG-MBP[319-370]-6xHis |
| c4-4hx (EAQA) <sub>4</sub>     | MBP[1-316]-BLA[24-286]-G-(EAQA) <sub>4</sub> -EG-MBP[319-370]-6xHis |

<sup>a</sup> Linker residues between BLA[24-286] and MBP[319-370] and MBP[1-314] and BLA[24-286].

<sup>b</sup> Based on gene sequencing.

Supplementary Table 2. MIC<sub>Amp</sub> of BL21 cells expressing c4 glycine variants at 18°C.

| Protein | Linker residues <sup>a</sup> | MIC <sub>Amp</sub> (μg ml <sup>-1</sup> ) <sup>b</sup> |           |           | Ratio <sup>c</sup> |
|---------|------------------------------|--------------------------------------------------------|-----------|-----------|--------------------|
|         |                              | Trial                                                  | - Maltose | + Maltose |                    |
| MBP     | N/A                          | 1                                                      | 1         | 1         | 1                  |
|         |                              | 2                                                      | 1         | 1         | 1                  |
|         |                              | 3                                                      | 1         | 1         | 1                  |
|         |                              | Median                                                 | 1         | 1         | 1                  |
| c4      | DKT                          | 1                                                      | 4096      | 4096      | 1                  |
|         |                              | 2                                                      | 4096      | 4096      | 1                  |
|         |                              | 3                                                      | 2048      | 2048      | 1                  |
|         |                              | Median                                                 | 4096      | 4096      | 1                  |
| c4-1G   | GKT                          | 1                                                      | 4096      | 4096      | 1                  |
|         |                              | 2                                                      | 4096      | 4096      | 1                  |
|         |                              | 3                                                      | 2048      | 2048      | 1                  |
|         |                              | Median                                                 | 4096      | 4096      | 1                  |
| c4-2G   | GGT                          | 1                                                      | 4096      | 4096      | 1                  |
|         |                              | 2                                                      | 4096      | 4096      | 1                  |
|         |                              | 3                                                      | 2048      | 2048      | 1                  |
|         |                              | Median                                                 | 4096      | 4096      | 1                  |
| c4-3G   | GGG                          | 1                                                      | 4096      | 4096      | 1                  |
|         |                              | 2                                                      | 4096      | 4096      | 1                  |
|         |                              | 3                                                      | 2048      | 2048      | 1                  |
|         |                              | Median                                                 | 4096      | 4096      | 1                  |
| c4-4G   | GGG +<br>R315G               | 1                                                      | 4096      | 4096      | 1                  |
|         |                              | 2                                                      | 4096      | 4096      | 1                  |
|         |                              | 3                                                      | 2048      | 2048      | 1                  |
|         |                              | Median                                                 | 4096      | 4096      | 1                  |
| c4-5G   | GGG +<br>R315G<br>P316G      | 1                                                      | 4096      | 4096      | 1                  |
|         |                              | 2                                                      | 4096      | 4096      | 1                  |
|         |                              | 3                                                      | 2048      | 2048      | 1                  |
|         |                              | Median                                                 | 4096      | 4096      | 1                  |

<sup>a</sup> Residues between BLA[24-286] and MBP[319-370].

<sup>b</sup> MIC<sub>Amp</sub> was defined as the lowest concentration of ampicillin at which the OD<sub>600nm</sub> was < 5 % of the OD<sub>600nm</sub> in the absence of ampicillin.

<sup>c</sup> (With maltose) / (without maltose).

Supplementary Table 3. MIC<sub>Amp</sub> of BL21 cells expressing c4 glycine variants at 37°C.

| Protein | Linker residues <sup>b</sup> | MIC <sub>Amp</sub> (µg ml <sup>-1</sup> ) <sup>b</sup> |           |           | Ratio <sup>c</sup> |
|---------|------------------------------|--------------------------------------------------------|-----------|-----------|--------------------|
|         |                              | Trial                                                  | - Maltose | + Maltose |                    |
| MBP     | N/A                          | 1                                                      | 1         | 1         | 1                  |
|         |                              | 2                                                      | 1         | 1         | 1                  |
|         |                              | 3                                                      | 1         | 1         | 1                  |
|         |                              | Median                                                 | 1         | 1         | 1                  |
| c4      | DKT                          | 1                                                      | 2048      | 2048      | 1                  |
|         |                              | 2                                                      | 2048      | 2048      | 1                  |
|         |                              | 3                                                      | 1024      | 2048      | 2                  |
|         |                              | Median                                                 | 2048      | 2048      | 1                  |
| c4-1G   | GKT                          | 1                                                      | 2048      | 2048      | 1                  |
|         |                              | 2                                                      | 1024      | 2048      | 2                  |
|         |                              | 3                                                      | 1024      | 2048      | 2                  |
|         |                              | Median                                                 | 1024      | 2048      | 2                  |
| c4-2G   | GGT                          | 1                                                      | 512       | 2048      | 4                  |
|         |                              | 2                                                      | 512       | 2048      | 4                  |
|         |                              | 3                                                      | 512       | 2048      | 4                  |
|         |                              | Median                                                 | 512       | 2048      | 4                  |
| c4-3G   | GGG                          | 1                                                      | 128       | 2048      | 16                 |
|         |                              | 2                                                      | 64        | 1024      | 16                 |
|         |                              | 3                                                      | 64        | 2048      | 32                 |
|         |                              | Median                                                 | 64        | 2048      | 16                 |
| c4-4G   | GGG +<br>R315G               | 1                                                      | 64        | 2048      | 32                 |
|         |                              | 2                                                      | 32        | 2048      | 64                 |
|         |                              | 3                                                      | 64        | 2048      | 32                 |
|         |                              | Median                                                 | 64        | 2048      | 32                 |
| c4-5G   | GGG +<br>R315G<br>P316G      | 1                                                      | 64        | 2048      | 32                 |
|         |                              | 2                                                      | 64        | 1024      | 16                 |
|         |                              | 3                                                      | 64        | 1024      | 16                 |
|         |                              | Median                                                 | 64        | 1024      | 16                 |

<sup>a</sup> Residues between BLA[24-286] and MBP[319-370].

<sup>b</sup> MIC<sub>Amp</sub> was defined as the lowest concentration of ampicillin at which the OD<sub>600nm</sub> was < 5 % of the OD<sub>600nm</sub> in the absence of ampicillin.

<sup>c</sup> (With maltose) / (without maltose).



Supplementary Table 4. MIC<sub>Amp</sub> of BL21 cells expressing c4 EAQA linker variants at 37°C.

| Protein<br>(Linker) <sup>a</sup> | Trial  | MIC <sub>Amp</sub> (µg ml <sup>-1</sup> ) <sup>b</sup> when grown on media at the indicated pH <sup>c</sup> |      |      |     |           |      |      |      |
|----------------------------------|--------|-------------------------------------------------------------------------------------------------------------|------|------|-----|-----------|------|------|------|
|                                  |        | - Maltose                                                                                                   |      |      |     | + Maltose |      |      |      |
|                                  |        | 6                                                                                                           | 7    | 7.5  | 8   | 6         | 7    | 7.5  | 8    |
| c4<br>(DKT)                      | 1      | 4096                                                                                                        | 2048 | 1024 | 512 | 4096      | 4096 | 1024 | 512  |
|                                  | 2      | 2048                                                                                                        | 1024 | 1024 | 512 | 2048      | 2048 | 1024 | 1024 |
|                                  | 3      | 2048                                                                                                        | 1024 | 1024 | 512 | 2048      | 2048 | 1024 | 1024 |
|                                  | Median | 2048                                                                                                        | 1024 | 1024 | 512 | 2048      | 2048 | 1024 | 1024 |
| c4-2hx<br>(EAQA) <sub>2</sub>    | 1      | 4096                                                                                                        | 2048 | 256  | 256 | 4096      | 4096 | 1024 | 512  |
|                                  | 2      | 2048                                                                                                        | 2048 | 256  | 128 | 4096      | 4096 | 1024 | 1024 |
|                                  | 3      | 2048                                                                                                        | 2048 | 256  | 128 | 4096      | 4096 | 1024 | 1024 |
|                                  | Median | 2048                                                                                                        | 2048 | 256  | 128 | 4096      | 4096 | 1024 | 1024 |
| c4-3hx<br>(EAQA) <sub>3</sub>    | 1      | 2048                                                                                                        | 1024 | 256  | 32  | 4096      | 2048 | 1024 | 256  |
|                                  | 2      | 2048                                                                                                        | 512  | 128  | 32  | 4096      | 4096 | 1024 | 512  |
|                                  | 3      | 2048                                                                                                        | 512  | 128  | 64  | 4096      | 4096 | 1024 | 512  |
|                                  | Median | 2048                                                                                                        | 512  | 128  | 32  | 4096      | 4096 | 1024 | 512  |
| c4-4hx<br>(EAQA) <sub>4</sub>    | 1      | 2048                                                                                                        | 2048 | 512  | 32  | 4096      | 4096 | 1024 | 512  |
|                                  | 2      | 1024                                                                                                        | 512  | 128  | 32  | 2048      | 2048 | 1024 | 512  |
|                                  | 3      | 1024                                                                                                        | 512  | 128  | 64  | 2048      | 2048 | 1024 | 512  |
|                                  | Median | 1024                                                                                                        | 512  | 128  | 32  | 2048      | 2048 | 1024 | 512  |

<sup>a</sup> Residues between BLA[24-286] and MBP[319-370].

<sup>b</sup> MIC<sub>Amp</sub> was defined as the lowest concentration of ampicillin at which the OD<sub>600nm</sub> was < 5 % of the OD<sub>600nm</sub> in the absence of ampicillin.

<sup>c</sup> Initial pH of growth media

Supplementary Table 5. Enzymatic activity of c4 and c4-3G at 18 °C and 37 °C.

| Protein | Temperature | Initial Rate <sup>a</sup> (sec <sup>-1</sup> ) |             | Ratio <sup>b</sup> |
|---------|-------------|------------------------------------------------|-------------|--------------------|
|         |             | - Maltose                                      | + Maltose   |                    |
| c4      | 18 °C       | 60.2 ± 3.4                                     | 64.2 ± 0.9  | 1.07 ± 0.05        |
|         | 37 °C       | 99.9 ± 1.5                                     | 103.6 ± 2.1 | 1.04 ± 0.04        |
| c4-3G   | 18 °C       | 56.3 ± 2.1                                     | 58.0 ± 2.3  | 1.03 ± 0.04        |
|         | 37 °C       | 44.2 ± 1.2                                     | 90.7 ± 4.6  | 2.05 ± 0.15        |

<sup>a</sup> Initial rate of hydrolysis of 100 μM nitrocefin at pH 7.2 at the indicated temperature in the presence or absence of 5 mM maltose. Error is the standard deviation of three measurements.

<sup>b</sup> (With maltose) / (without maltose).

Supplementary Table 6. Enzymatic activity of c4 and c4-3hx at pH 6 and pH 8.

| Protein | pH  | Initial Rate <sup>a</sup> (sec <sup>-1</sup> ) |              | Ratio <sup>b</sup> |
|---------|-----|------------------------------------------------|--------------|--------------------|
|         |     | - Maltose                                      | + Maltose    |                    |
| c4      | 6.0 | 117.6 ± 5.4                                    | 124.0 ± 6.9  | 1.06 ± 0.07        |
|         | 8.0 | 106.9 ± 4.3                                    | 120.7 ± 2.1  | 1.13 ± 0.03        |
| c4-3hx  | 6.0 | 97.1 ± 1.6                                     | 104.1 ± 10.2 | 1.07 ± 0.11        |
|         | 8.0 | 25.3 ± 1.9                                     | 68.9 ± 2.9   | 2.73 ± 0.23        |

<sup>a</sup> Initial rate of hydrolysis of 100 μM nitrocefin at 37°C at the indicated pH in the presence or absence of 5 mM maltose. Error is the standard deviation of three independent measurements.

<sup>b</sup> (With maltose) / (without maltose).

Supplementary Table 7. Number of identifiable peaks for c4 and c4-3G at 18 °C and 37 °C, and c4 and c4-3hx in pH 6 and pH 8 at 25 °C compared to the number of assigned residues for MBP<sup>a</sup> and BLA<sup>b</sup>.

| Protein | Temperature or pH <sup>c</sup> | Maltose | Both domains    | MBP domain      | BLA domain      |
|---------|--------------------------------|---------|-----------------|-----------------|-----------------|
| c4      | 18 °C                          | 0 mM    | 387 / 579 (67%) | 221 / 333 (66%) | 166 / 246 (68%) |
|         |                                | 5 mM    | 400 / 579 (69%) | 230 / 333 (69%) | 170 / 246 (69%) |
|         | 37 °C                          | 0 mM    | 398 / 579 (69%) | 217 / 333 (65%) | 181 / 246 (74%) |
|         |                                | 5 mM    | 399 / 579 (63%) | 222 / 333 (67%) | 177 / 246 (72%) |
| c4-3G   | 18 °C                          | 0 mM    | 395 / 579 (68%) | 228 / 333 (69%) | 167 / 246 (68%) |
|         |                                | 5 mM    | 393 / 579 (68%) | 225 / 333 (68%) | 168 / 246 (68%) |
|         | 37 °C                          | 0 mM    | 247 / 579 (43%) | 143 / 333 (43%) | 104 / 246 (42%) |
|         |                                | 5 mM    | 382 / 579 (66%) | 218 / 333 (66%) | 164 / 246 (67%) |
| c4      | pH 6                           | 0 mM    | 375 / 579 (65%) | 215 / 333 (65%) | 160 / 246 (65%) |
|         |                                | 5 mM    | 395 / 579 (68%) | 224 / 333 (67%) | 171 / 246 (70%) |
|         | pH 8                           | 0 mM    | 388 / 579 (67%) | 228 / 333 (69%) | 160 / 246 (65%) |
|         |                                | 5 mM    | 376 / 579 (65%) | 221 / 333 (66%) | 155 / 246 (63%) |
| c4-3hx  | pH 6                           | 0 mM    | 371 / 579 (64%) | 214 / 333 (64%) | 157 / 246 (64%) |
|         |                                | 5 mM    | 371 / 579 (64%) | 213 / 333 (64%) | 158 / 246 (64%) |
|         | pH 8                           | 0 mM    | 362 / 579 (63%) | 214 / 333 (64%) | 148 / 246 (60%) |
|         |                                | 5 mM    | 363 / 579 (63%) | 214 / 333 (64%) | 149 / 246 (61%) |

<sup>a</sup> Evenas et al.<sup>1</sup>

<sup>b</sup> Savard et al.<sup>2</sup>

<sup>c</sup> Where a temperature is indicated, the pH was pH 7.2. Where a pH is indicated, the temperature was 25 °C.

Supplementary Table 8. MIC<sub>Amp</sub> of BL21 cells expressing c4 and c4-3hx at 25°C.

| Protein | Linker residues <sup>a</sup> | MIC <sub>Amp</sub> (μg ml <sup>-1</sup> ) <sup>b</sup> |           |           | Ratio <sup>c</sup> |
|---------|------------------------------|--------------------------------------------------------|-----------|-----------|--------------------|
|         |                              | Trial                                                  | - Maltose | + Maltose |                    |
| c4      | DKT                          | 1                                                      | 1024      | 1024      | 1                  |
|         |                              | 2                                                      | 1024      | 1024      | 1                  |
|         |                              | 3                                                      | 1024      | 1024      | 1                  |
|         |                              | Median                                                 | 1024      | 1024      | 1                  |
| c4-3hx  | (EAQA) <sub>3</sub>          | 1                                                      | 1024      | 1024      | 1                  |
|         |                              | 2                                                      | 1024      | 1024      | 1                  |
|         |                              | 3                                                      | 1024      | 1024      | 1                  |
|         |                              | Median                                                 | 1024      | 1024      | 1                  |

<sup>a</sup> Residues between BLA[24-286] and MBP[319-370].

<sup>b</sup> MIC<sub>Amp</sub> was defined as the lowest concentration of ampicillin at which the OD<sub>600nm</sub> was < 5 % of the OD<sub>600nm</sub> in the absence of ampicillin.

<sup>c</sup> (With maltose) / (without maltose).

Supplementary Table 9. Transition midpoint ( $T_m$ ) of c4, c4-3G, and c4-3hx quantified by circular dichroism in the absence and presence of maltose.

| Protein |        |         | Transition Midpoint <sup>a</sup> (°C) |            |
|---------|--------|---------|---------------------------------------|------------|
|         |        |         | -Maltose                              | +Maltose   |
| c4      | pH 7.2 | $T_m^1$ | 47.7 ± 0.7                            | N/A        |
|         |        | $T_m^2$ | 64.5 ± 0.2                            | 63.5 ± 0.3 |
| c4-3G   | pH 7.2 | $T_m^1$ | 45.4 ± 1.0                            | N/A        |
|         |        | $T_m^2$ | 66.9 ± 0.5                            | 63.9 ± 0.1 |
| c4      | pH6    | $T_m^1$ | 47.9 ± 0.5                            | 58.4 ± 0.2 |
|         |        | $T_m^2$ | N/A                                   | N/A        |
|         | pH8    | $T_m^1$ | 41.7 ± 0.4                            | 56.8 ± 0.2 |
|         |        | $T_m^2$ | 69.3 ± 0.5                            | N/A        |
| c4-3hx  | pH6    | $T_m^1$ | 51.6 ± 0.1                            | 59.8 ± 0.2 |
|         |        | $T_m^2$ | N/A                                   | N/A        |
|         | pH8    | $T_m^1$ | 35.3 ± 0.3                            | 54.4 ± 1.6 |
|         |        | $T_m^2$ | N/A                                   | N/A        |

<sup>a</sup> Error is the standard deviation calculated from three independent measurements.

Supplementary Table 10. Calorimetric parameters of c4, c4-3G, and c4-3hx quantified by differential scanning calorimetry in the temperature range 20°C to 53°C.

| Protein             | Calorimetric Parameters <sup>a</sup> |                                                             |                                                            |                                      |
|---------------------|--------------------------------------|-------------------------------------------------------------|------------------------------------------------------------|--------------------------------------|
|                     | T <sub>m</sub><br>(°C)               | ΔH <sub>cal</sub> <sup>b</sup><br>(kcal mol <sup>-1</sup> ) | ΔH <sub>vH</sub> <sup>c</sup><br>(kcal mol <sup>-1</sup> ) | ΔH <sub>cal</sub> / ΔH <sub>vH</sub> |
| c4 <sup>d</sup>     | 47.0 ± 0.0                           | 195.3 ± 1.2                                                 | 187.7 ± 4.0                                                | 1.04 ± 0.03                          |
| c4-3G <sup>d</sup>  | 42.5 ± 0.0                           | 90.2 ± 6.8                                                  | 100.6 ± 3.4                                                | 0.90 ± 0.09                          |
|                     | 46.6 ± 0.2                           | 62.3 ± 0.1                                                  | 200.9 ± 4.4                                                | 0.31 ± 0.01                          |
|                     | 48.4 ± 0.1                           | 37.3 ± 6.4                                                  | 277.7 ± 19.7                                               | 0.14 ± 0.03                          |
| c4 <sup>e</sup>     | 45.1 ± 0.0                           | 161.7 ± 1.5                                                 | 142.3 ± 2.6                                                | 1.14 ± 0.03                          |
| c4-3hx <sup>e</sup> | 35.2 ± 0.7                           | 22.8 ± 1.6                                                  | 77.1 ± 5.1                                                 | 0.30 ± 0.01                          |
|                     | 39.3 ± 0.1                           | 59.7 ± 4.5                                                  | 112.4 ± 3.1                                                | 0.53 ± 0.06                          |
|                     | 43.3 ± 0.0                           | 29.9 ± 0.7                                                  | 175.7 ± 0.6                                                | 0.17 ± 0.01                          |

<sup>a</sup> Error is the standard deviation calculated from three independent measurements.

<sup>b</sup> The calorimetric enthalpy at the transition midpoint.

<sup>c</sup> The van't Hoff enthalpy at the transition midpoint.

<sup>d</sup> Protein was in the sample buffer of pH 7.2.

<sup>e</sup> Protein was in the sample buffer of pH 8.0.

## **SUPPLEMENTARY REFERENCES**

1. Evenas, J. et al. Ligand-induced structural changes to maltodextrin-binding protein as studied by solution NMR spectroscopy. *J Mol Biol* **309**, 961-74 (2001).
2. Savard, P.Y. & Gagne, S.M. Backbone dynamics of TEM-1 determined by NMR: evidence for a highly ordered protein. *Biochemistry* **45**, 11414-24 (2006).
